# Supplementary material
Source: publisher figshare collection journal article supplement (https://sage.figshare.com/ndownloader/files/20020673)
Supplement: Supplementary file 1 [file 20020673]

## Supplementary Figure S1. Project Timeline

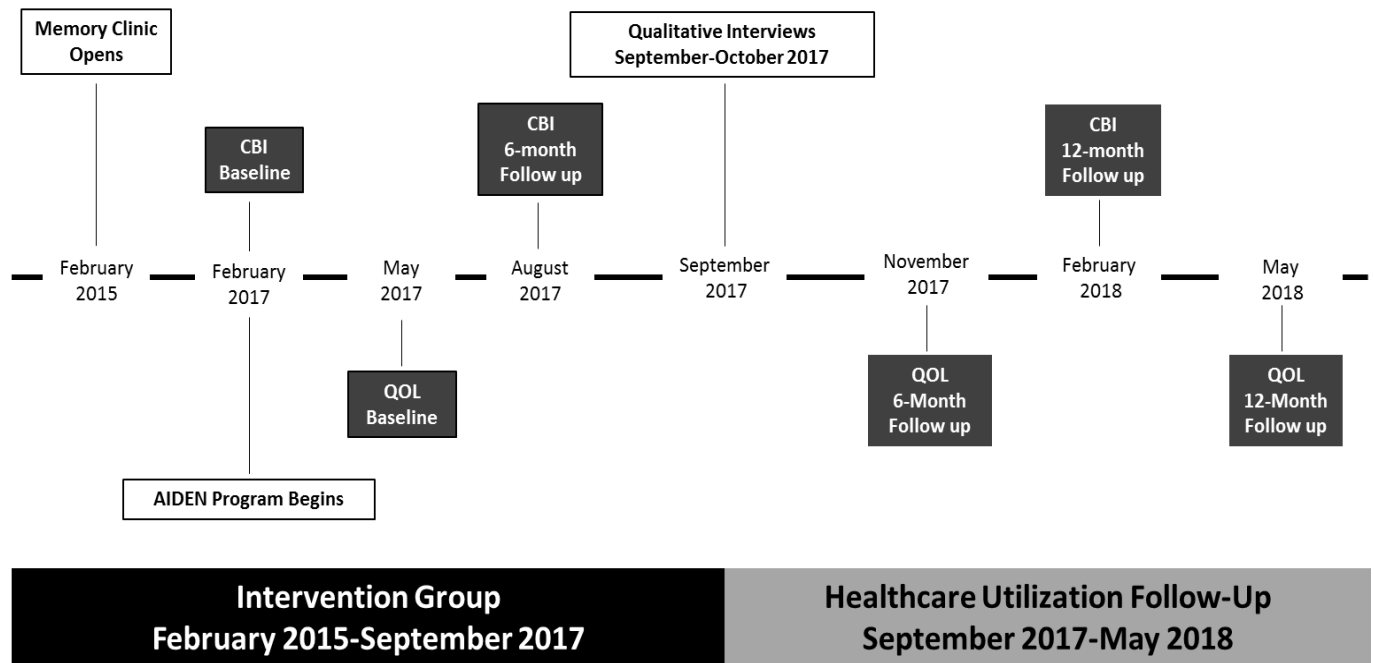

**Supplementary Figure S2. Selection of participants for key informant interviews with caregivers**

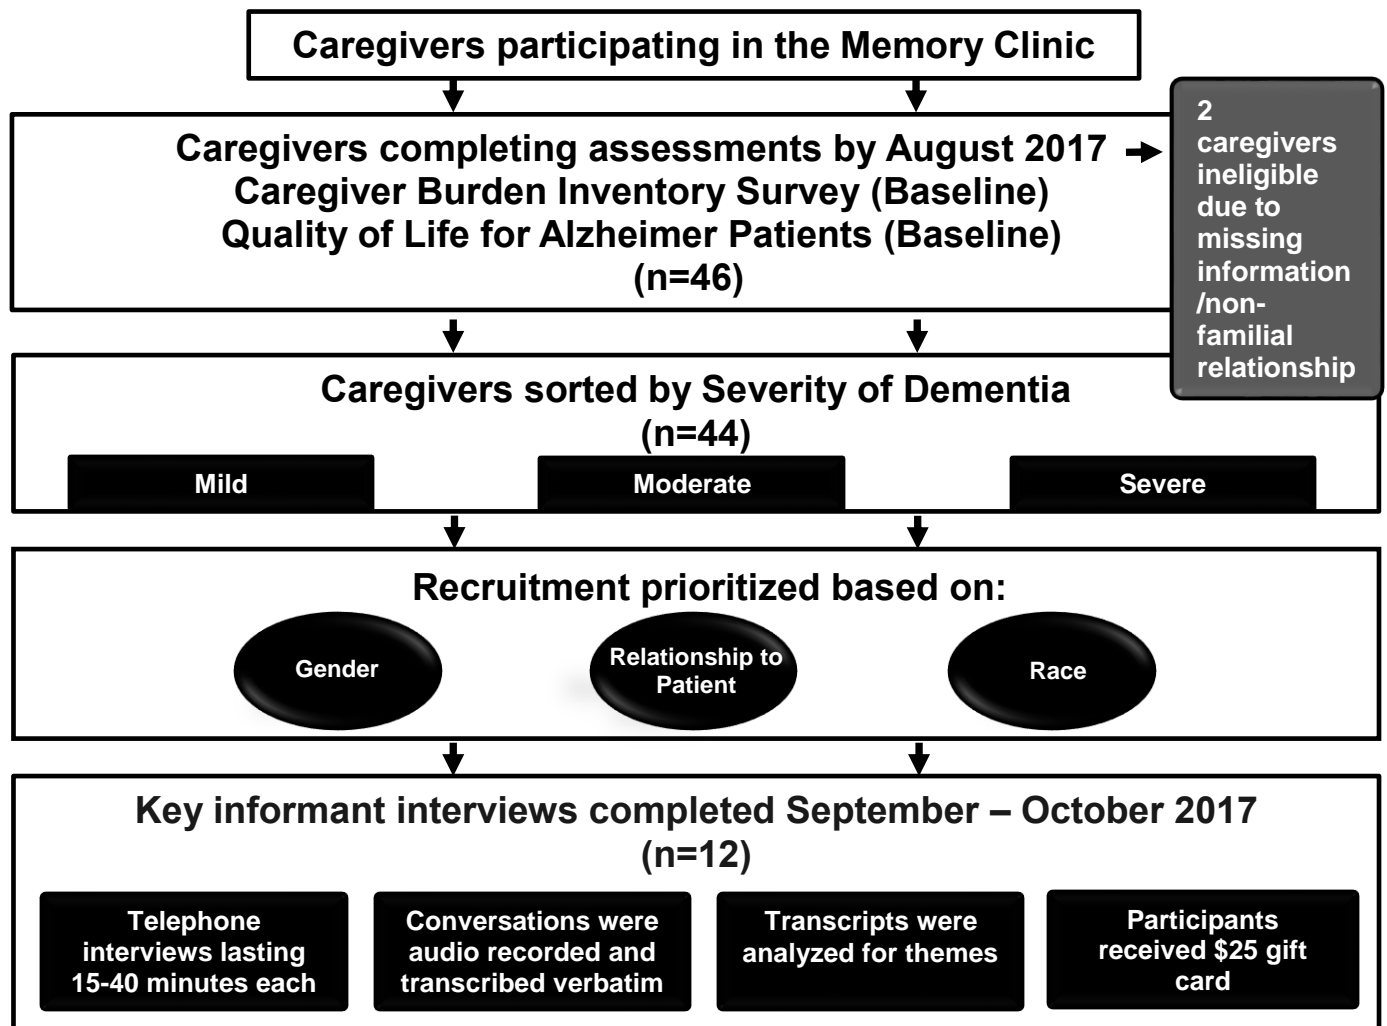

**Supplementary Figure S3. Distribution of healthcare utilization between intervention and comparison group**

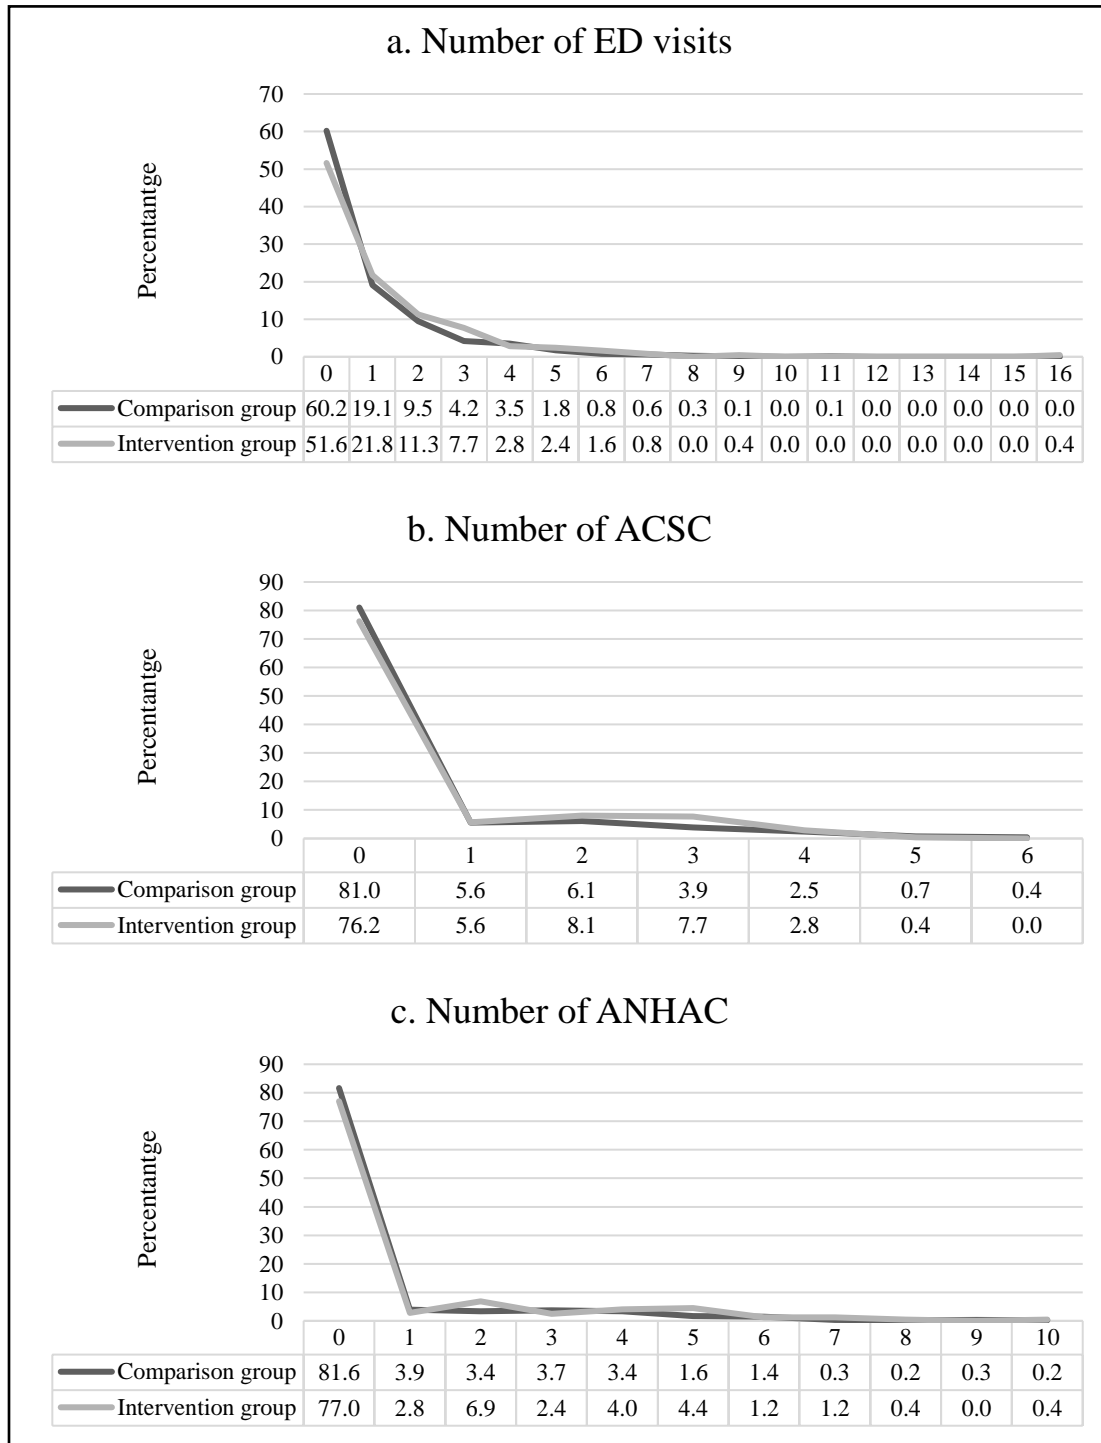

ED, emergency department; ACSC, ambulatory care-sensitive conditions (PQI 6.0 from AHRQ); ANHAC, additional nursing home-specific avoidable conditions.

**Supplementary Table S1. Demographics for dementia patients from the retrospective matched cohort**

|                                                             | Comparison Group         | Intervention Group       | Standardized Difference* |
|-------------------------------------------------------------|--------------------------|--------------------------|--------------------------|
| Total, n (%)                                                | 938 (79.8)               | 238 (20.2)               |                          |
| <b>Age, median (range)</b>                                  | <b>81 (65-102)</b>       | <b>81.5 (65-96)</b>      | 0.10                     |
| Female, n (%)                                               | 691 (73.7)               | 173 (72.7)               | 0.02                     |
| Marital status, n (%)                                       |                          |                          | 0.02                     |
| Married                                                     | 346 (36.9)               | 83 (34.9)                |                          |
| Widowed                                                     | 385 (41.0)               | 103 (43.3)               |                          |
| Others                                                      | 207 (22.1)               | 52 (21.8)                |                          |
| Race/Ethnicity, n (%)                                       |                          |                          | 0.00                     |
| Caucasian                                                   | 709 (75.6)               | 181 (76.1)               |                          |
| African American                                            | 164 (17.5)               | 41 (17.2)                |                          |
| Other                                                       | 65 (6.9)                 | 16 (6.7)                 |                          |
| Traumatic brain injury, n (%)                               | 51 (5.4)                 | 16 (6.7)                 | 0.05                     |
| Down syndrome, n (%)                                        | 0 (0.0)                  | 0 (0.0)                  | --                       |
| Mental retardation, n (%)                                   | 3 (0.3)                  | 1 (0.4)                  | 0.02                     |
| Alcohol abuse, n (%)                                        | 19 (2.0)                 | 8 (3.4)                  | 0.08                     |
| Drug abuse, n (%)                                           | 10 (1.1)                 | 4 (1.7)                  | 0.05                     |
| High risk medication, n (%)                                 | 127 (13.5)               | 24 (10.1)                | 0.11                     |
| <b>Charlson Comorbidity Index, median (range)</b>           | <b>0 (0-12)</b>          | <b>0 (0-12)</b>          | 0.02                     |
| <b>Unemployment rate, median (range)</b>                    | <b>8.4 (0.6-33.9)</b>    | <b>7.9 (0.5-33.9)</b>    | 0.04                     |
| <b>Median household income in thousands, median (range)</b> | <b>53.3 (16.9-179.8)</b> | <b>54.5 (17.0-190.1)</b> | 0.01                     |
| <b>Percentage with bachelor's degree, median (range)</b>    | <b>27.0 (2.6-84.5)</b>   | <b>30.8 (2.6-86.7)</b>   | 0.03                     |
| <b>Baseline ED visit, median (range)</b>                    | <b>0 (0-23)</b>          | <b>0 (0-8)</b>           | <b>0.02</b>              |
| <b>Baseline ACSC, median (range)</b>                        | <b>0 (0-6)</b>           | <b>0 (0-6)</b>           | <b>0.02</b>              |
| <b>Baseline ANHAC, median (range)</b>                       | <b>0 (0-9)</b>           | <b>0 (0-6)</b>           | <b>0.09</b>              |

\*Standardized difference = difference in means or proportions divided by standard error; imbalance defined as value greater than 0.20 (small effect size)

**Supplementary Table S2. Demographics for dementia patients and their caregivers who answered QoL-AD and CBI**

|                                        | Patient           | Caregivers        |
|----------------------------------------|-------------------|-------------------|
| Total                                  | 124               | 132               |
| <b>Age, median (range)</b>             | <b>80 (54-94)</b> | --                |
| Female, n (%)                          | 96 (77.4)         | 96 (72.7)         |
| Race/Ethnicity, n (%)                  |                   |                   |
| Caucasian                              | 89 (71.8)         | 96 (72.7)         |
| African American                       | 28 (22.6)         | 30 (22.7)         |
| Other                                  | 7 (5.6)           | 7 (5.3)           |
| Marital status, n (%)                  |                   |                   |
| Married                                | 57 (46.0)         | --                |
| Widowed                                | 53 (42.7)         | --                |
| Other                                  | 14 (11.3)         | --                |
| Dementia Severity, n (%)               |                   |                   |
| Mild Cognitive Impairment              | 8 (6.5)           | --                |
| Mild Dementia                          | 39 (31.5)         | --                |
| Moderate Dementia                      | 61 (49.2)         | --                |
| Severe Dementia                        | 16 (12.9)         | --                |
| New Patient, n (%)                     | 63 (50.8)         | --                |
| Relation to the patient, n (%)         |                   |                   |
| Child                                  | --                | 83 (62.9)         |
| Spouse                                 | --                | 39 (29.5)         |
| Other                                  | --                | 10 (7.6)          |
| <b>Baseline CBI, median (range)</b>    | --                | <b>27 (0-96)</b>  |
| <b>Baseline QoL-AD, median (range)</b> | --                | <b>31 (17-45)</b> |

**CBI, caregiver burden inventory; QoL-AD, Quality of Life-Alzheimer's Disease**
